# Supplementary material for: Inhibition of the colony-stimulating-factor-1 receptor affects the resistance of lung cancer cells to cisplatin
Source: PubMed Central journal article supplement (PMC5302923; doi:10.18632/oncotarget.10895), 2016-07-28
Supplement: oncotarget-07-56408-s001.pdf [file oncotarget-07-56408-s001.pdf]

# Inhibition of the colony-stimulating-factor-1 receptor affects the resistance of lung cancer cells to cisplatin

## Supplementary Materials

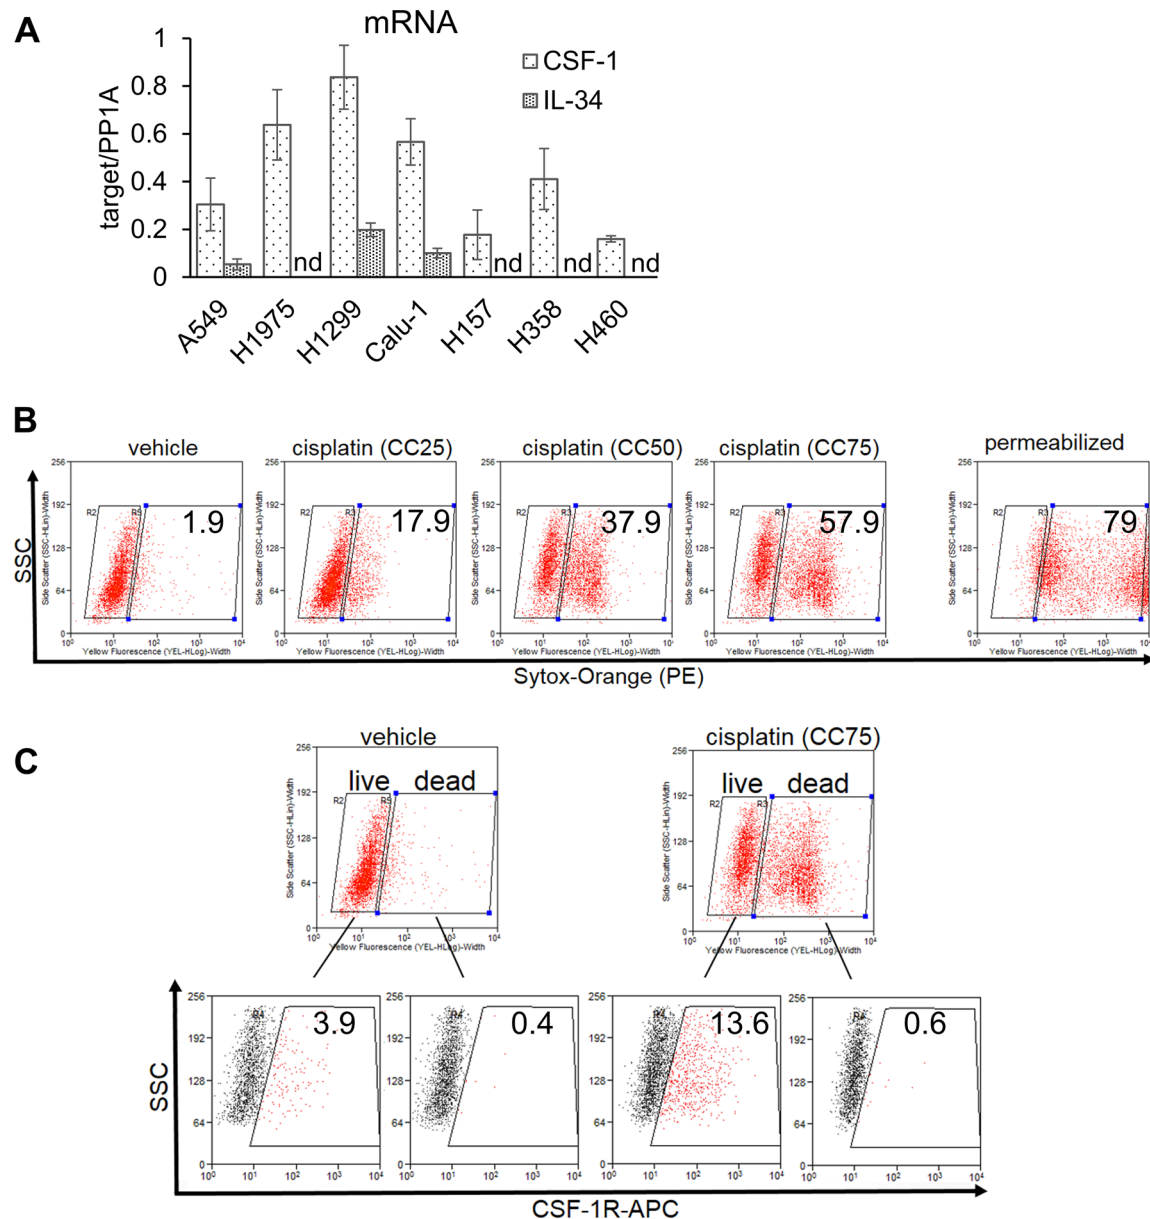

**Supplementary Figure S1:** (A) Lung cancer cell lines express CSF-1 and IL-34 mRNA. (A) Expression of CSF-1 and IL-34 mRNA (normalized to PP1A) as assessed by quantitative PCR. Mean  $\pm$  SE of two experiments. (B–C) The CSF-1R<sup>pos</sup> cells survive cisplatin treatment. (B) Representative dot plots of H1299 cells treated for 72 hrs with the indicated doses of cisplatin and stained with the cell impermeant dye Sytox-Orange before FACS analysis. As a positive control for the staining, H1299 treated with Triton X-100 for 10 min were stained (permeabilized). (C) Representative dot plots indicating the percentage of CSF-1R<sup>pos</sup> cells in Sytox-negative (live) and Sytox-positive (dead) cells, respectively, after treatment with vehicle or cisplatin as from Supplementary Figure S1B.

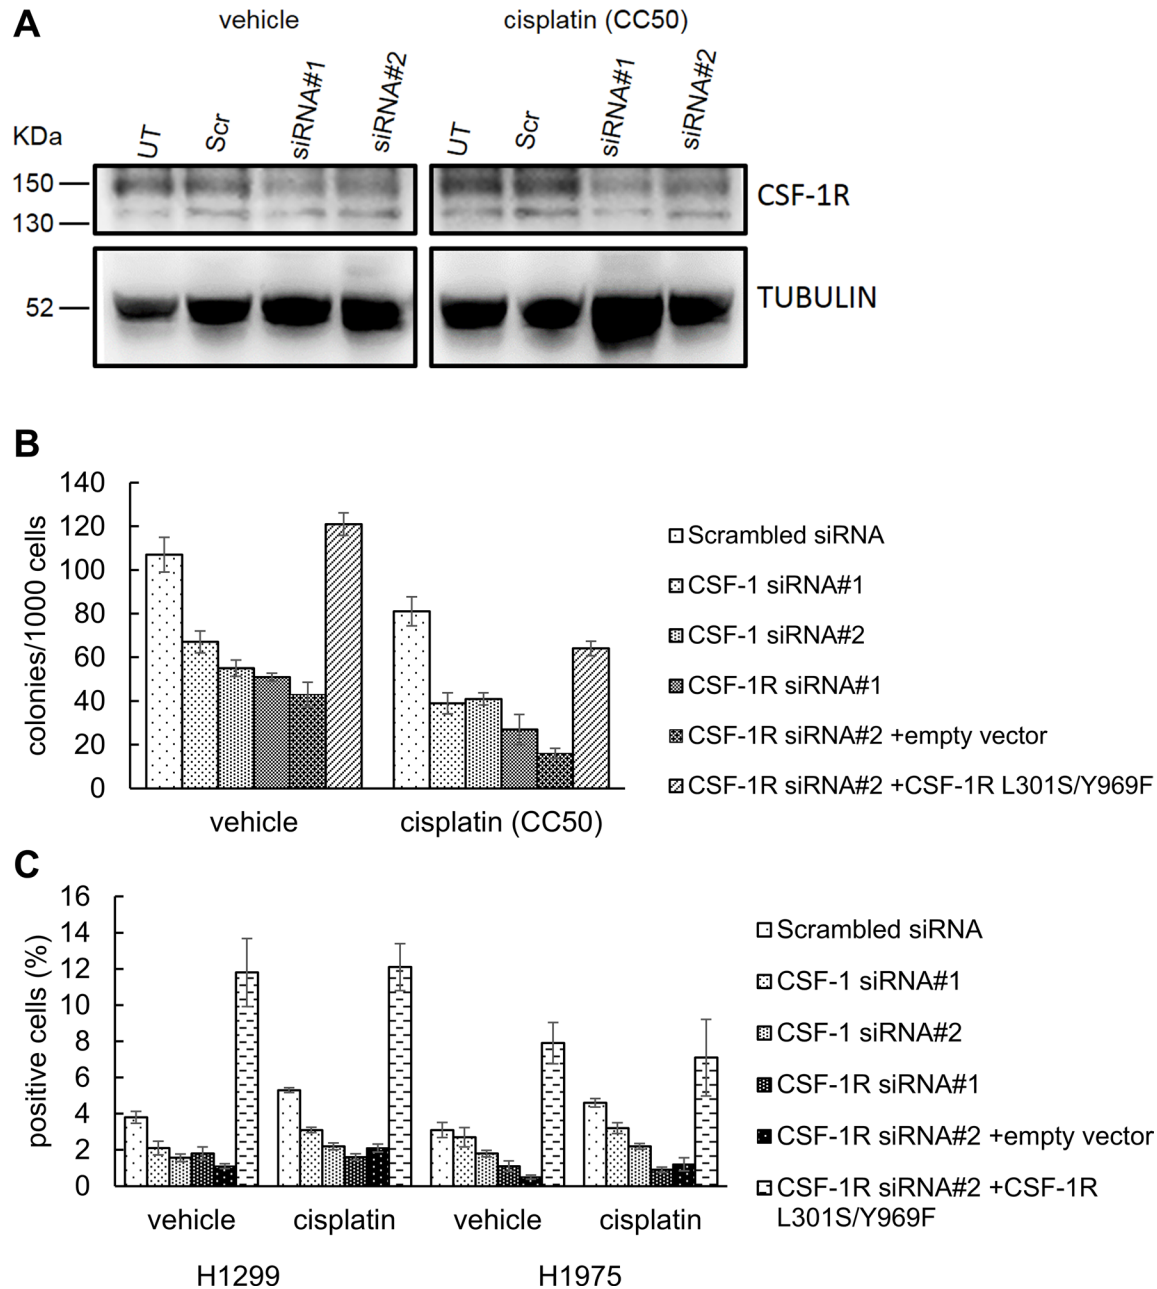

**Supplementary Figure S2:** (A) Knocking down of CSF-1R affects the clonogenicity and resistance to cisplatin of lung cancer cell lines. (A) Representative western blottings of whole cell lysates from H1299 cells untransfected (UT) or transfected with a scrambled-control and CSF-1R targeting- siRNAs, and treated with vehicle or cisplatin for 72 hrs. Staining for tubulin was used as a loading control. (B) Briefly, H1299 cells transfected with CSF-1R targeting siRNAs, were treated 48 hrs later with vehicle- or cisplatin (CC<sub>25</sub>)-for 16 hrs, and seeded at clonal density. Additionally, cells transfected with the CSF-1R targeting siRNA#2 were co-transfected with either an empty vector or a vector coding for a constitutively active CSF-1R (L301S/Y969F). Histograms reporting the number of the formed colonies 7–10 days after seeding. Mean  $\pm$  SE of three independent experiments. (C) Histograms reporting the number of CSF-1R<sup>pos</sup> cells in H1299 and H1975 cells treated as from Supplementary Figure S2B, as assessed by FACS. Mean  $\pm$  SE of two independent experiments.

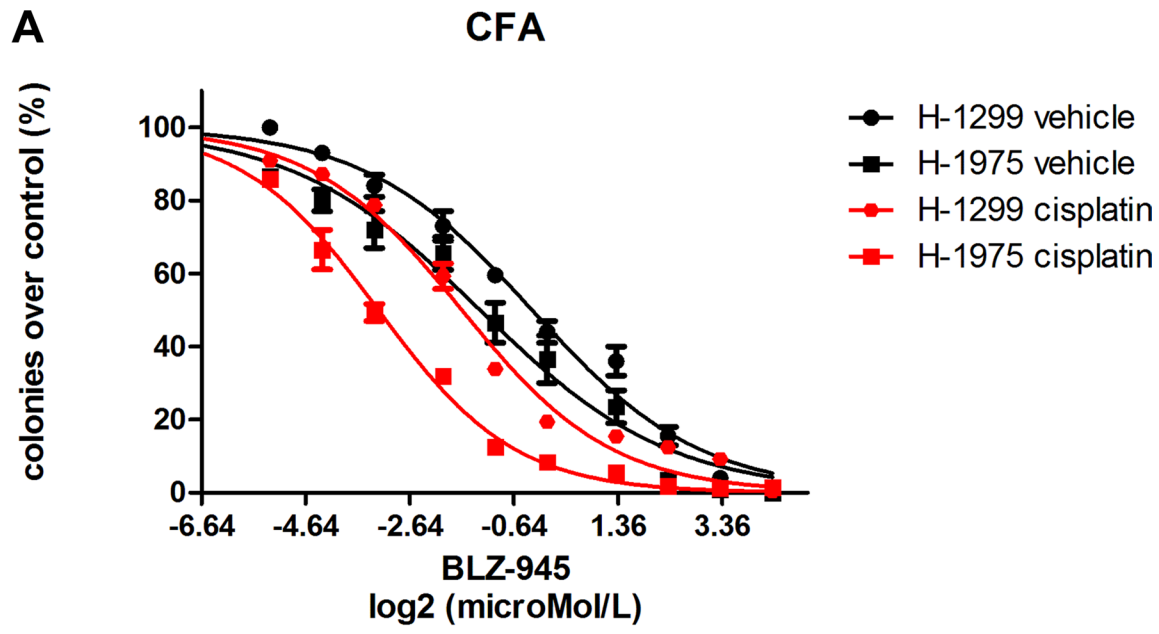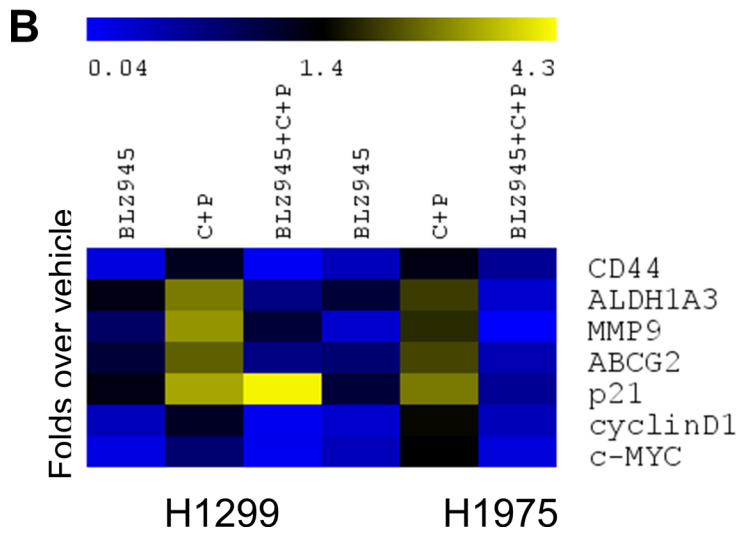

**Supplementary Figure S3:** (A) Treatment of lung cancer cell lines with BLZ-945 affects clonogenicity and expression of EMT genes. (A) Graph reporting the percentage of colonies (over vehicle-control) of H1299 and H1975 cells treated for 24 hrs with BLZ-945 at the indicated doses, in the presence of vehicle or cisplatin (CC<sub>25</sub>), before seeding at clonal density. The formed colonies were stained 7-9dd later. Mean ± SE of two independent experiments. (B) Heatmap. Relative expression levels of proliferation- and EMT-associated genes in H1299 and H1975 cells treated with BLZ-945 (CC<sub>50</sub>), C + P or both for 24 hrs, as assessed by quantitative PCR.

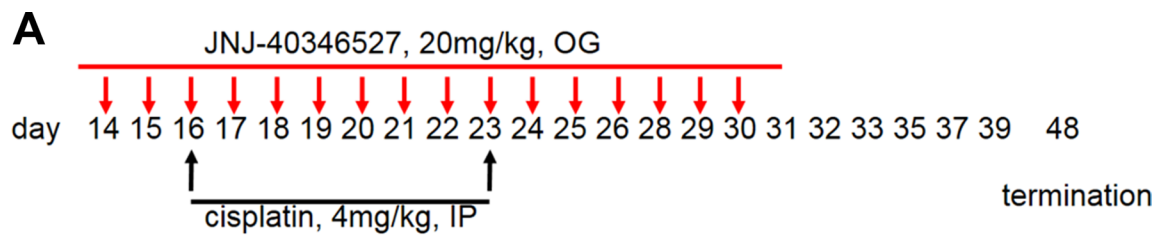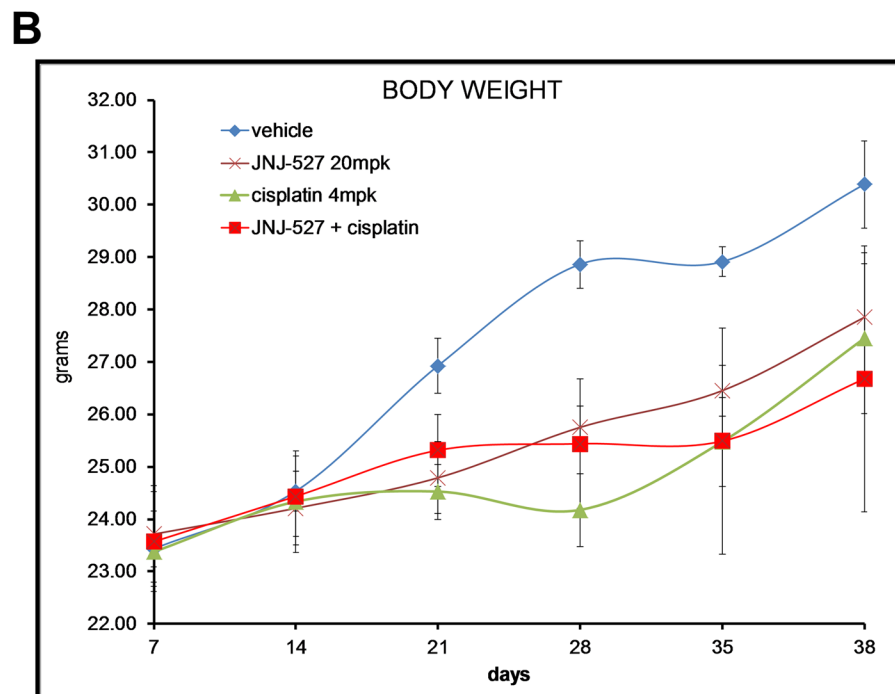

**Supplementary Figure S4:** (A) Scheme of the *in vivo* studies. Treatment started at day 14 (when the average tumor volume was  $\geq 100 \text{ mm}^3$ ). Study was terminated at day 48, when tumors were excised, disaggregated and pooled before being processed for FACS. (B) A transient weight loss is induced by both cisplatin and JNJ-40346527 treatment. Graph reporting the average body weight of each group of mice as from Figure 4. The red bar indicates the period of treatment. Mean  $\pm$  SE for each group of mice is reported.

**Supplementary Table S1: List of the primers used in this study for the quantitative PCR assays**

|                                        |                                                    |
|----------------------------------------|----------------------------------------------------|
| CSF-1R forward<br>CSF-1R reverse       | GAATGACTCCAACACTACATTGTC<br>GTGTAGACAGTCAAAGATG    |
| CSF-1 forward<br>CSF-1 reverse         | GCTGTTGTTGGTCTGTCTC<br>CATGCTCTTCATAATCCTTG        |
| IL-34 forward IL<br>34 reverse         | AAACAAAGCTCCGTCCTAAACTG<br>GCCGCATACTGCAATGAGG     |
| OCT4 forward<br>OCT4 reverse           | GGGAGATTGATAACTGGTGTGTT<br>GTGTATATCCCAGGGTGATCCTC |
| SOX2 forward<br>SOX2 reverse           | TACAGCATGTCCTACTCGCAG<br>GAGGAAGAGGTAACCACAGGG     |
| NANOG forward<br>NANOG reverse         | TTTGTGGGCCTGAAGAAAAC<br>AGGGCTGTCCTGAATAAGCAG      |
| C-MYC forward<br>C-MYC reverse         | GTCAAGAGGGCGAACACACAAC<br>TTGGACGGACAGGATGTATGC    |
| VIMENTIN forward<br>VIMENTIN reverse   | AGTCCACTGAGTACCGGAGAC<br>CATTTCACGCATCTGGCGTTC     |
| ABCG2 forward<br>ABCG2 reverse         | ACGAACGGATTAACAGGGTCA<br>CTCCAGACACACCACGGAT       |
| ALDH1A3 forward<br>ALDH1A3 reverse     | TCTCGACAAAGCCCTGAAGT<br>TATTCGGCCAAAGCGTATTC       |
| MMP9 forward<br>MMP9 reverse           | TGTACCGCTATGGTTACTCTCG<br>GGCAGGGACAGTTGCTTCT      |
| CD44 forward<br>CD44 reverse           | AAGGTGGAGCAAACACAACC<br>AACTGCAATGCAAACCTGCAAG     |
| P21 forward<br>P21 reverse             | TGTCCGTCAGAACCCATGC<br>AAAGTCGAAGTTCCATCGCTC       |
| PPIA forward<br>PPIA reverse           | TCTGAGCACTGGAGAGAAAGG<br>GGAAAACATGGAACCCAAAGG     |
| Cyclin D1 forward<br>Cyclin D1 reverse | TTCGGGATGATTGGAATAGC<br>TGTGAGCTGGCTTCATTGAG       |
